# Supplementary material for: Non-Lethal Concentrations of CdCl2 Cause Marked Alternations in Cellular Stress Responses within Exposed Sertoli Cell Line
Source: MDPI journal article supplement (doi:10.3390/toxics11020167), 2023-02-09

## Supplementary Materials

**Table S1. The list of specific primers used for qPCR**

| Gene             | Reference Sequence | Primer                                                        | Amplicon Length |
|------------------|--------------------|---------------------------------------------------------------|-----------------|
| Gapdh*           | NM_001289726.1     | F 5'-GGAGAAACCTGCCAAGTATGA-3'<br>R 5'-TCCTCAGTGTAGCCCAAGA-3'  | 90              |
| Mt2              | NM_008630.2        | F 5'-AAAGAGGCTTCCGACAAGTG-3'<br>R 5'-GCTAGGCTTCTACATGGTCTATTT | 90              |
| Mt1              | NM_013602.3        | F 5'-AGGGCTGTGTCTGCAAAG-3'<br>R 5'-CTGGGTGGTCCGATACTATTT      | 100             |
| Wdr45*           | NM_001290792.1     | F 5'-TAAAGACACCCGCCTTAACC-3'<br>R 5'-CCACTGAGAGTCCACGTATTG    | 88              |
| Ulk1*            | NM_001347394.1     | F 5'-ACCAGGCAGACATTGAGAAC-3'<br>R 5'-AGCAGGTAGTCAGGCATAGA     | 95              |
| Ulk2*            | NM_013881.4        | F 5'-TCCACCATCCCTTCCAGATA-3'<br>R 5'-CAGAGTCTTTGGACACCTGTAG   | 98              |
| Nbr1*            | NM_008676.3        | F 5'-CAGAAGAGGATCGTTGGAGTG-3'<br>R 5'-TGGTTAGTGTTCATGGGTGTATG | 101             |
| Atg7*            | NM_001253717.2     | F 5'-TCCTGAGAGCATCCCTCTAAT-3'<br>R 5'-GGCTCGACACAGATCATCATAG  | 106             |
| Atg14            | NM_172599.4        | F 5'-AGTCTGCTGGGATGGTTAGA-3'<br>R 5'-GGAATGATGGAGGAAGTGAGTG   | 101             |
| CHOP             | NM_007837.4        | F 5'-TCCTGTCCTCAGATGAAATTGG-3'<br>R 5'-GCAGGGTCAAGAGTAGTGAAG  | 91              |
| GRP78*           | NM_001163434.1     | F 5'-GAGACTGCTGAGGCGTATTT-3'<br>R 5'-CAGCATCTTTGGTTGCTTGTC    | 100             |
| Xbp1*            | NM_013842.3        | F 5'-TGGAAGAAGAGAACCACAAACT-3'<br>R 5'-CATTCCCAAGCGTGTCTTAAC  | 104             |
| PERK*            | NM_010121.3        | F 5'-GTTACACAGCCAGCGAAGAA-3'<br>R 5'-GGCCTCTGTACATCCCTAAGTA   | 102             |
| SIRT1*           | NM_019812.2        | F 5'-GGCCTAATAGACTTGCAAAGGA-3'<br>R 5'-CTCAGCACCGTGGAATATGTAA | 98              |
| SIRT3*           | NM_022433.2        | F 5'-CTGGATGGACAGGACAGATAAG-3'<br>R 5'-TGAAGTCTTGCTGGACATAGG  | 84              |
| PGC-1 $\alpha$ * | NM_008904.2        | F 5'-CGACAGCTATGAAGCCTATGAG-3'<br>R 5'-CTTCTGCCTCTCTCTGTTTG   | 106             |
| TFAM             | NM_009360.4        | F 5'-AGGCCCAAGAAACCAGTTAG-3'<br>R 5'-AGAAAGTCCATGGCTACAGAAA   | 109             |
| Nrf1*            | NM_001164226.1     | F 5'-AGCGATTGTACTCTGCATCTC-3'<br>R 5'-CCAGGATCATGCTCTTGTACTT  | 107             |
| HTRA2*           | NM_019752.3        | F 5'-TGACTCCCAGCATCCTTATTG-3'<br>R 5'-GGAGCCCAGGATAACTTTATGA  | 95              |
| Opal             | NM_001199177.1     | F 5'-GTCAGGCTTTCTGGAACAGTAG-3'<br>R 5'-TTCGTCAACTGGTGGTCTTTAG | 93              |

|        |                |                                                                  |     |
|--------|----------------|------------------------------------------------------------------|-----|
| Mfn1   | NM_024200.4    | F 5'-GGAAGAGAGGGAAGACCAAATC-3'<br>R 5'-CGTGACCTCCTTGATCTTCTTC    | 97  |
| Mfn2*  | NM_001285920.1 | F 5'-ATGCAGCAGGACATGATAGAC-3'<br>R 5'-GTCATAGCTGAGGGAGAAACAC     | 105 |
| Fis1*  | NM_025562.3    | F 5'-GCCTGGTTCGAAGCAAATAC-3'<br>R 5'-AAGACATAGTCCCGCTGTTC        | 103 |
| Mff*   | NM_029409.2    | F 5'-GCCTGGTTCGAAGCAAATAC-3'<br>R 5'-AAGACATAGTCCCGCTGTTC        | 103 |
| Nfe2l2 | NM_010902.5    | F 5'-GGCTCAGCACCTTGTATCTT-3'<br>R 5'-CACATTGCCATCTCTGGTTTG       | 107 |
| Hmox1* | NM_010442.2    | F 5'-GTACACATCCAAGCCGAGAA-3'<br>R 5'-TGGTACAAGGAAGCCATCAC        | 98  |
| Nqo1*  | NM_008706.5    | F 5'-CTCGAATCTGACCTCTATGCTATG-3'<br>R 5'-GATGACTCGGAAGGATACTGAAA | 107 |
| Gsta1* | NM_008181.3    | F 5'-GACCAGAGCCATTCTCAACTAC-3'<br>R 5'-ATCAGGGCTCTCTCCTTCAT      | 75  |
| Gclc*  | NM_010295.2    | F 5'-CCTCCTCCTCCAACTCAGATA-3'<br>R 5'-GCAGTACCACGAATACCACATAG    | 106 |
| Gclm*  | NM_008129.4    | F 5'-GTATCAGTGGGCACAGGTAAA-3'<br>R 5'-CGGGTCATTGTGAGTCAGTAG      | 127 |
| Cat*   | NM_009804.2    | F 5'-GATGGTAACTGGGATCTTGTGG-3'<br>R 5'-GTGGGTTTCTTCTTCTGGCTATG   | 100 |
| Sod1*  | NM_011434.1    | F 5'-CTCAGGAGAGCATTCCATCATT-3'<br>R 5'-CTCCCAGCATTTCCAGTCTT      | 108 |
| Sod2   | NM_013671.3    | F 5'-AGCGTGACTTTGGGTCTTT-3'<br>R 5'-AGCGACCTTGCTCCTTATTG         | 111 |
| Sod3*  | NM_011435.3    | F 5'-GAACTTCACCAGAGGGAAAGAG-3'<br>R 5'-CAGTAGCAAGCCGTAGAACAA-3'  | 93  |

\* These pairs of primer are designed to span at least one intronic sequence.

Figure S1: Cell viability of TM4 after incubation with CdCl<sub>2</sub>

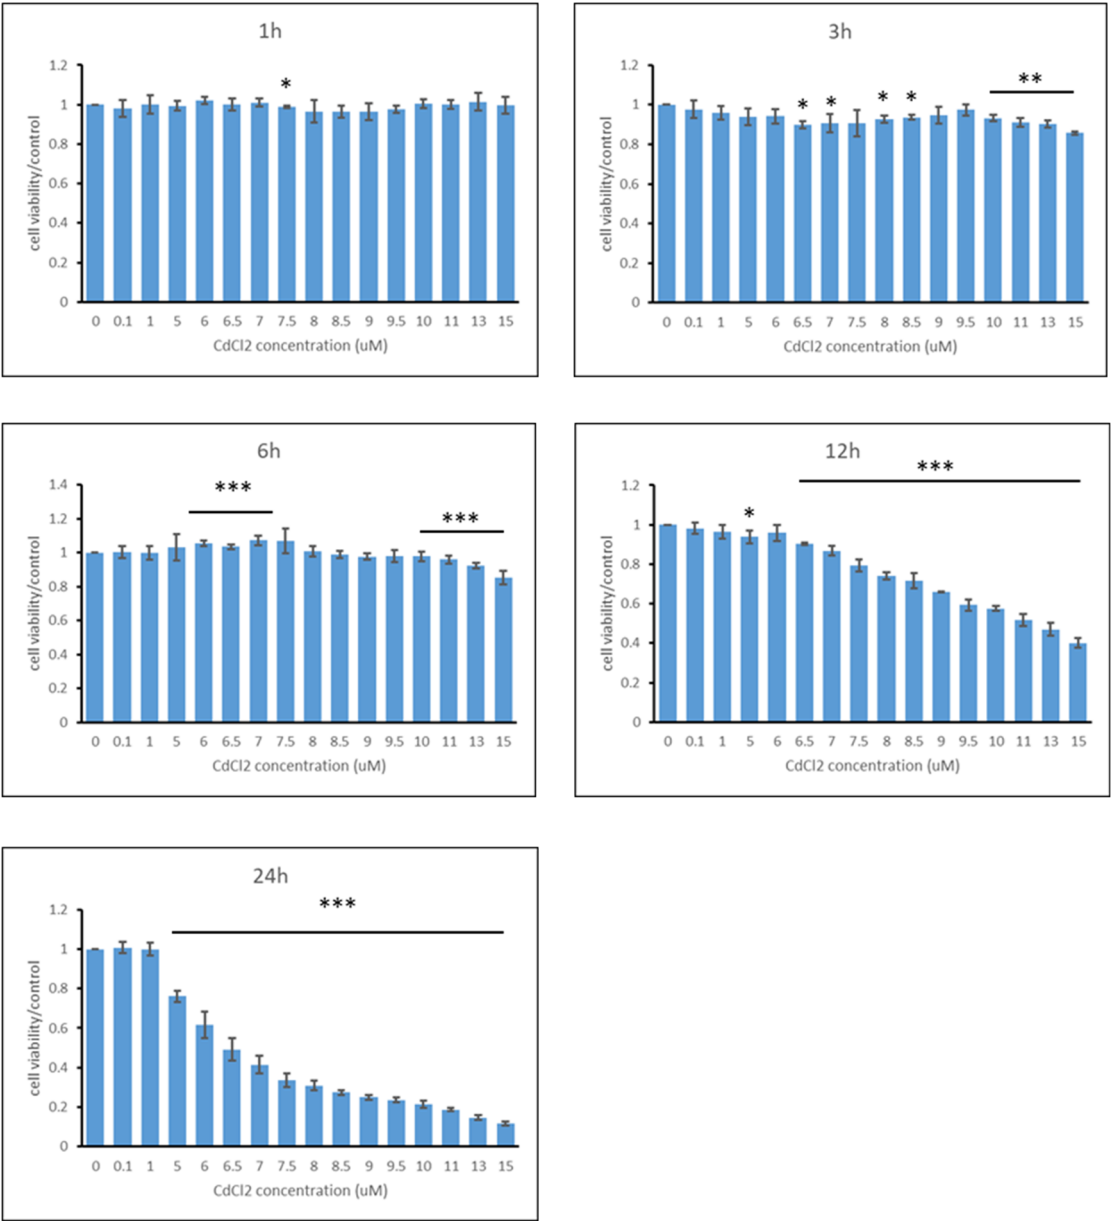

Figure S2: Morphological changes of TM4 after incubation with CdCl<sub>2</sub>

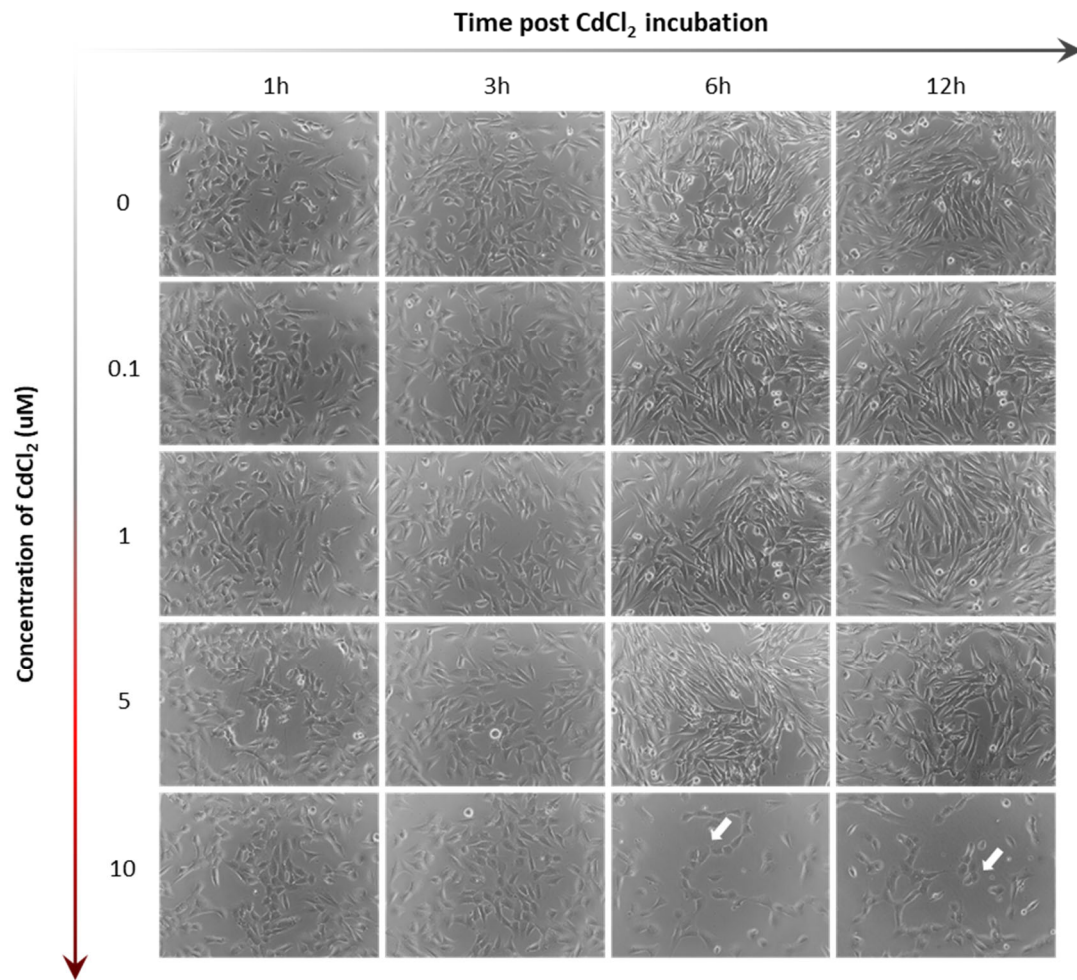

Figure S3: Transcriptional change of SOD1, Mff, and Tram

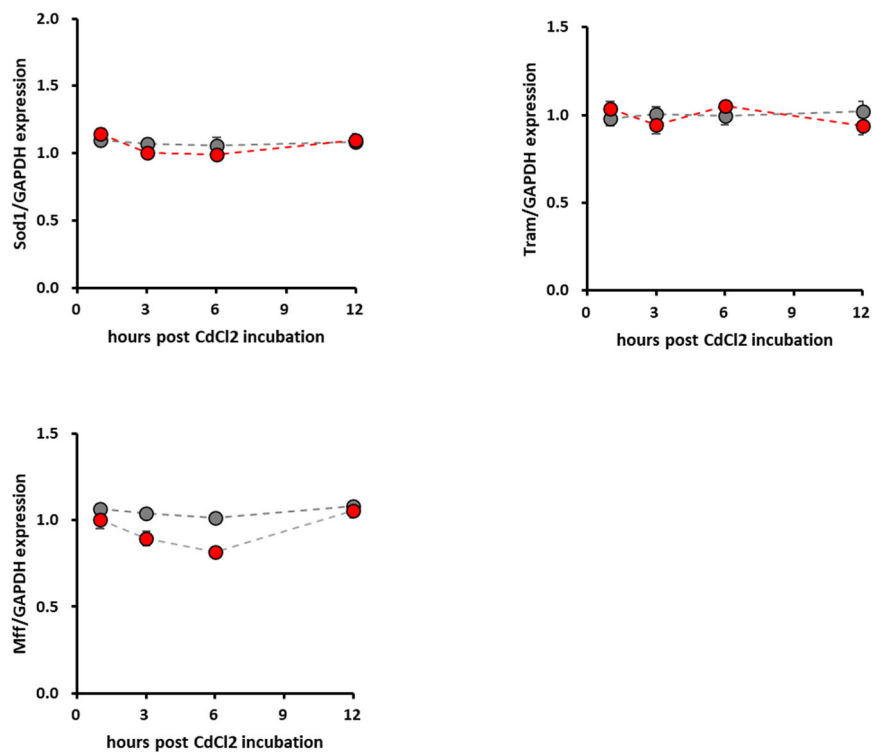

Atg5

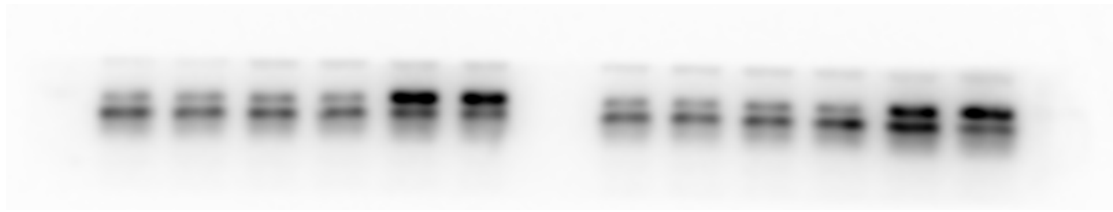

GAPDH1

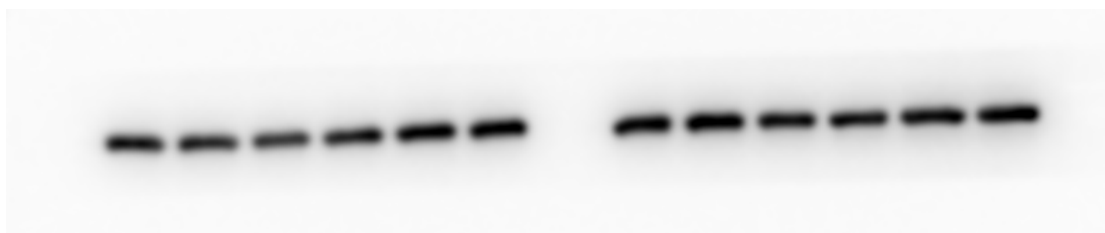

GAPDH2

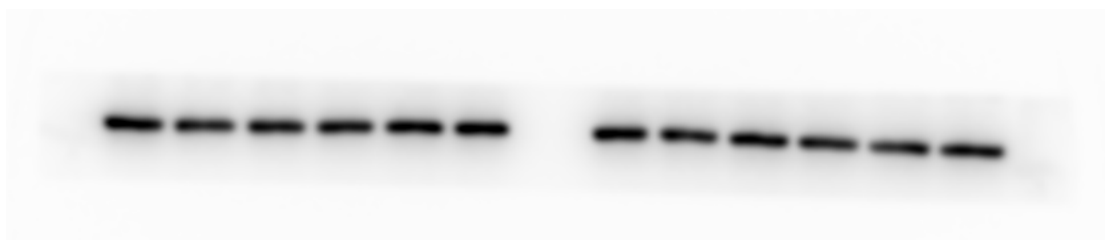



HO1

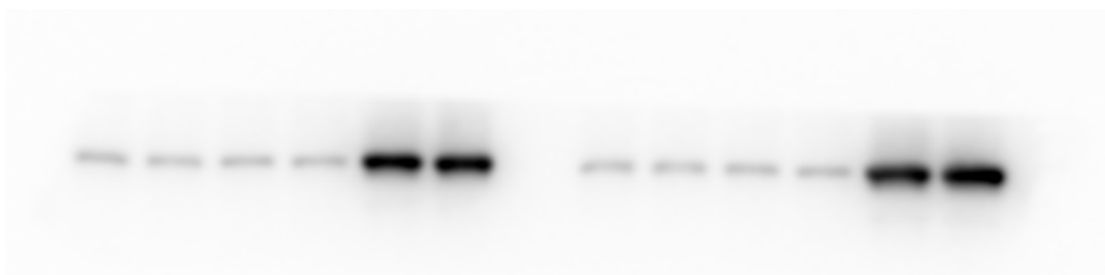

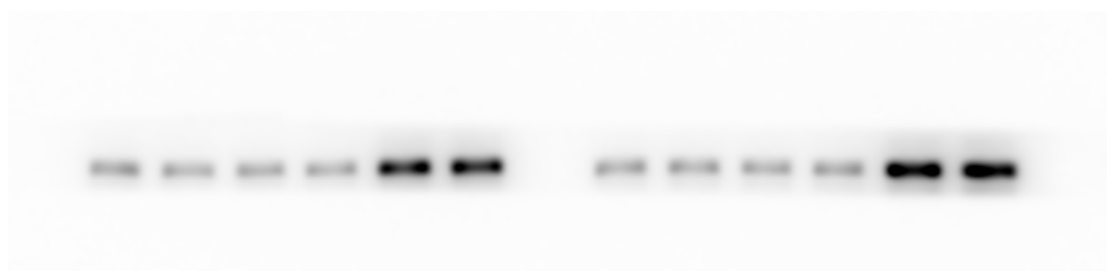

SOD

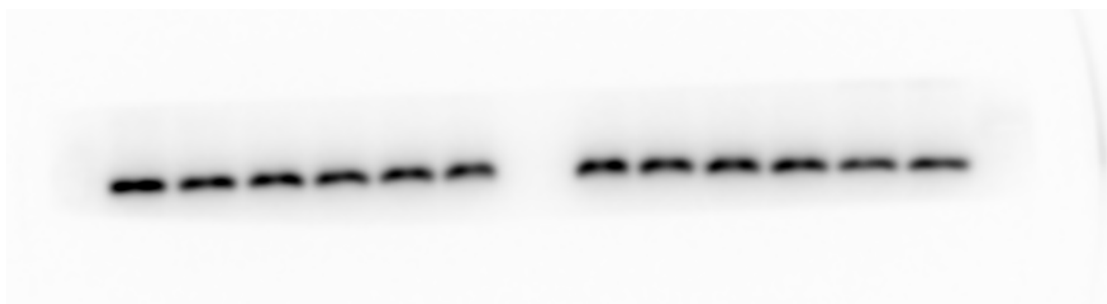

LC3

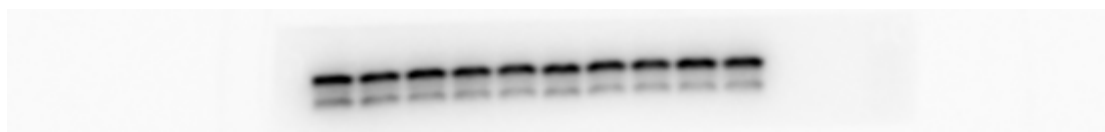

CHOP

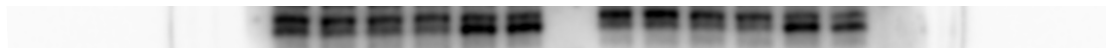

Hrf1

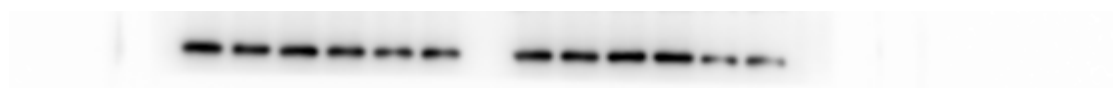

Mfn1

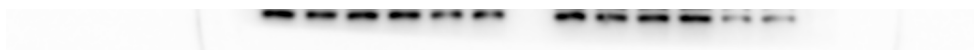

Supplement: s1 [file s1]
